# Supplementary material for: Physicochemical and Structural Characterization of Potato Starch with Different Degrees of Gelatinization
Source: MDPI journal article supplement (doi:10.3390/foods10051104), 2021-05-17
Supplement: s1 [file s1]

## Supplementary data

**Table S1.** The gelatinization onset temperatures of native and partially gelatinized potato starch samples pre-heated at 59 °C and 60 °C for different times (min) by calculating temperatures at the maximum points of Tan $\delta$ .

| Temperature | 0                             | 1                             | 3                             | 6                             | 9                              | 12                             | 15                             | 18                             |
|-------------|-------------------------------|-------------------------------|-------------------------------|-------------------------------|--------------------------------|--------------------------------|--------------------------------|--------------------------------|
| 59 °C       | 60.13 $\pm$ 0.58 <sup>D</sup> | 58.40 $\pm$ 1.21 <sup>E</sup> | 63.90 $\pm$ 0.00 <sup>C</sup> | 63.90 $\pm$ 0.00 <sup>C</sup> | 64.90 $\pm$ 0.00 <sup>BC</sup> | 65.90 $\pm$ 0.00 <sup>AB</sup> | 66.90 $\pm$ 0.00 <sup>A</sup>  | 65.90 $\pm$ 0.00 <sup>AB</sup> |
| 60 °C       | 60.13 $\pm$ 0.58 <sup>e</sup> | 63.35 $\pm$ 0.78 <sup>d</sup> | 63.90 $\pm$ 0.00 <sup>d</sup> | 65.40 $\pm$ 0.71 <sup>c</sup> | 65.90 $\pm$ 0.00 <sup>bc</sup> | 66.90 $\pm$ 0.00 <sup>ab</sup> | 66.90 $\pm$ 0.00 <sup>ab</sup> | 67.90 $\pm$ 0.00 <sup>a</sup>  |

Data are means  $\pm$  SD. <sup>A, B, C, D</sup> represent the significant difference of starch samples in row by heating at 59 °C ( $p < 0.05$ ); <sup>a, b, c</sup>, <sup>d, e</sup> represent the significant difference of starch samples in row by heating at 60 °C ( $p < 0.05$ ).

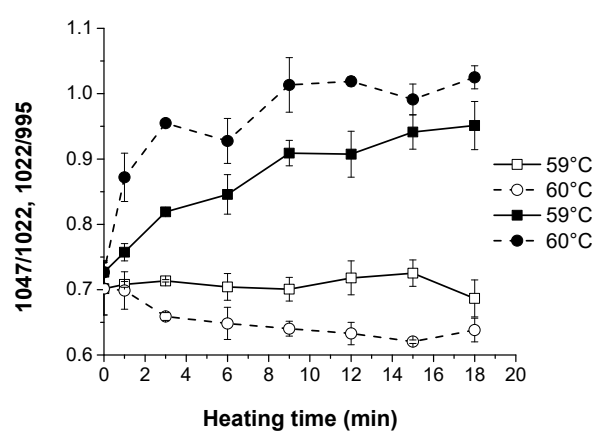

**Figure S1.** Ratios of absorbance 1047/1022 cm<sup>-1</sup> (open symbols) and 1022/995 cm<sup>-1</sup> (solid symbols) of native and partially gelatinized potato starch samples as a function of heating time.

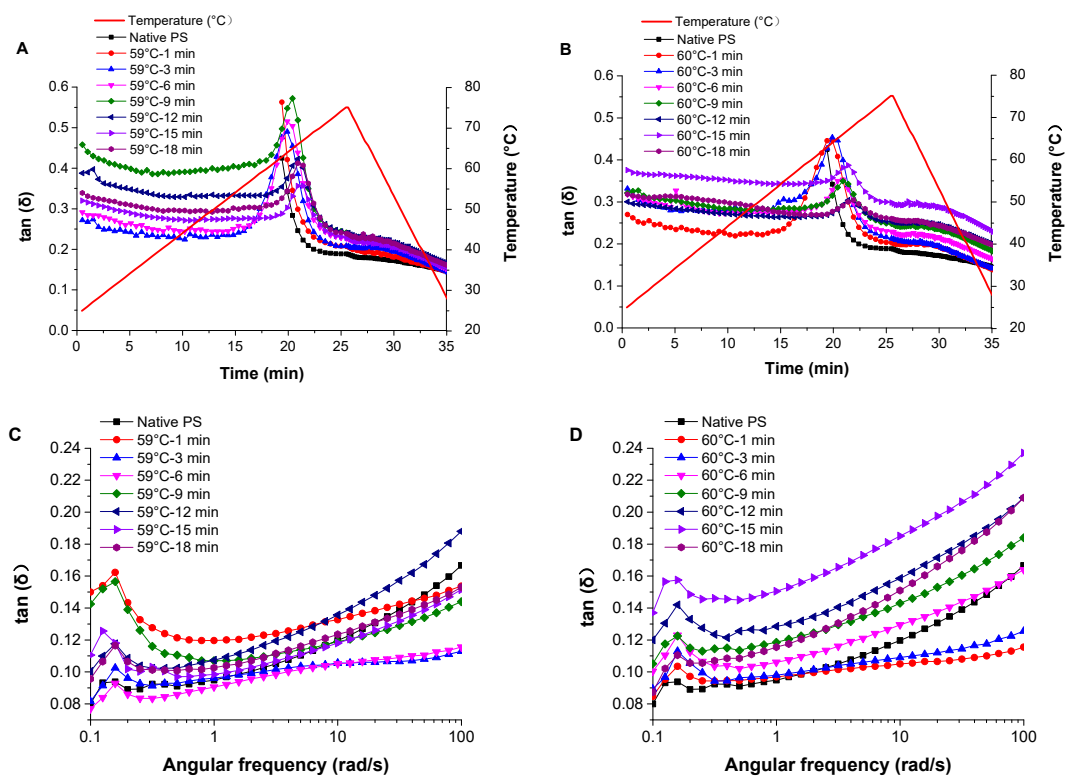

**Figure S2.** Temperature (A, B) and frequency (C, D) dependence of  $\tan \delta$  of native and partially gelatinized potato starch samples (A, C: pre-heated at 59 °C; B, D: pre-heated at 60 °C).
